# Supplementary material for: Waxy Oleogels for Partial Substitution of Solid Fat in Margarines
Source: MDPI journal article supplement (doi:10.3390/gels9090683), 2023-08-24
Supplement: s1 [file s1]

## Supplementary materials

**Table S1.** Fatty acid composition of fat components

| Fatty acid index                     | CF                 | BO                 | BHO                |
|--------------------------------------|--------------------|--------------------|--------------------|
| C 6:0                                | 0.02               | -                  | -                  |
| C 8:0                                | 0.20               | -                  | -                  |
| C 10:0                               | 0.17               | -                  | -                  |
| C 12:0                               | 1.40               | -                  | -                  |
| C 14:0                               | 1.30               | 0.09               | 0.11               |
| C 15:0                               | 0.06               | -                  | -                  |
| C 16:0                               | 34.88              | 7.50               | 7.41               |
| C 16:1                               | 0.03               | -                  | -                  |
| C 16:1, 9 – <i>c</i>                 | 0.15               | 0.12               | 0.11               |
| C 17:0                               | 0.09               | 0.04               | 0.05               |
| C 17:1                               | 0.03               | -                  | -                  |
| C 18:0                               | 4.06               | 3.41               | 3.38               |
| C 18:1, 9 – <i>t</i>                 | 0.10               | 0.06               | 0.06               |
| C 18:1, 9 – <i>c</i>                 | 32.85              | 20.48              | 20.52              |
| C 18:1, 11 – <i>t</i>                | 0.69               | 0.68               | 0.71               |
| C 18:1, 11 – <i>c</i>                | 0.01               | -                  | -                  |
| C 18:2, 9 – <i>c</i> , 12 – <i>t</i> | 0.19               | 0.40               | 0.42               |
| C 18:2, 9 – <i>t</i> , 12 – <i>c</i> | 0.17               | 0.35               | 0.31               |
| C 18:2                               | 22.70              | 65.04              | 65.09              |
| C 18:3                               | 0.13               | 0.11               | 0.13               |
| C 20:0                               | 0.30               | 0.16               | 0.15               |
| C 20:1                               | 0.13               | 0.14               | 0.14               |
| C 22:0                               | 0.22               | 0.83               | 0.85               |
| C 24:0                               | 0.11               | 0.48               | 0.40               |
| <b>Total</b>                         |                    |                    |                    |
| <b>SFA</b>                           | 42.81 <sup>a</sup> | 12.51 <sup>b</sup> | 12.35 <sup>b</sup> |
| <b>PUFA</b>                          | 23.19 <sup>a</sup> | 65.90 <sup>b</sup> | 65.95 <sup>b</sup> |
| <b>MUFA</b>                          | 33.99 <sup>a</sup> | 21.42 <sup>b</sup> | 21.48 <sup>b</sup> |

SFA – saturated fatty acids, PUFA – polyunsaturated fatty acids, MUFA – monounsaturated fatty acids. The letters (a, b) indicate significant differences ( $P < 0.05$ )
